# Supplementary material for: Constructing sodiophilic interconnected ion-transport channels towards a stable Na-metal anode
Source: Royal Society of Chemistry journal article supplement (doi:10.1039/d4ta03489a), 2024-01-01
Supplement: d4ta03489a1.pdf [file d4ta03489a1.pdf]

## Supporting Information

### **Constructing sodiophilic interconnected ion-transport channels towards stable Na-metal anode**

Yi Ding, Min Guo\*, Yawei Zhang, Song Lu\*, Jiadi Ying, Yeqing Wang, Tiancun Liu,  
Zhixin Yu\*

Institute of New Energy, School of Chemistry and Chemical Engineering, Shaoxing  
University, Shaoxing 312000, China

## Computation method

Density functional theory (DFT) calculations were performed in planewave basis set as implemented in the Vienna Ab Initio Simulation Package (VASP)<sup>1, 2</sup>. The exchange–correlation interactions were determined by the Perdew–Burke–Ernzerhof functional (PBE) within the generalized gradient approximation (GGA)<sup>3</sup>. The plane-wave basis was set with a cutoff energy of 450 eV. The convergence criteria for the energy and force was set to  $1 \times 10^{-4}$  eV and 0.02 eV/Å, respectively. A Monkhorst–Pack k-point mesh of  $2 \times 2 \times 1$  and  $4 \times 4 \times 1$  were used for the structure optimization and electron structure calculations, respectively. The empirical correction in Grimme’s method (DFT + D3) was used to describe the van der Waals interactions. For evaluating the energy barriers, the climbing image nudged elastic band (CI-NEB) method was employed to search all transition states and pathways.<sup>4, 5</sup>

The binding energy ( $E_b$ ) of  $\text{Na}^+$  on different supports were calculated based on equation below:

$$E_b = E_{\text{Na-Sub}} - E_{\text{Na}} - E_{\text{sub}}$$

Where the  $E_{\text{Na-Sub}}$ ,  $E_{\text{Na}}$ ,  $E_{\text{sub}}$  are the total energies of Na-adsorbed substrate, single Na atom and clean substrate.



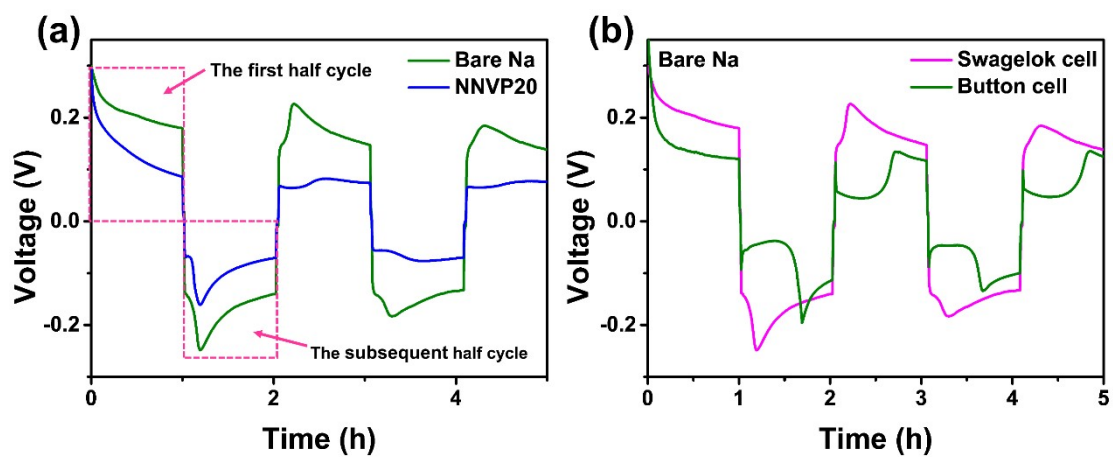

**Fig S1** (a) Voltage-time curve of NNVP20||NNVP20 and Na||Na in Swagelok cell; (b) Comparison of stripping/plating curves for Na||Na cell in Swagelok cell and button cell.

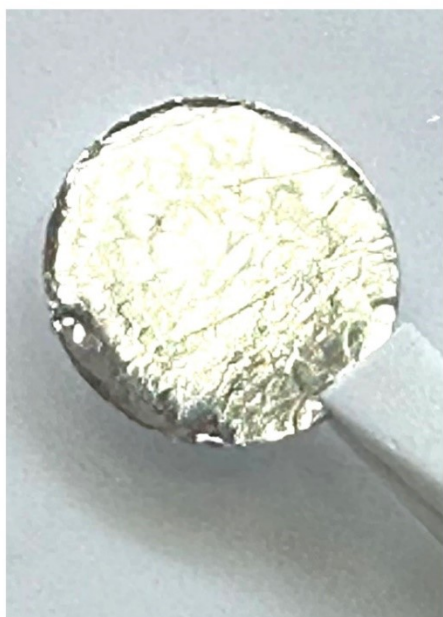

**Bare Na**

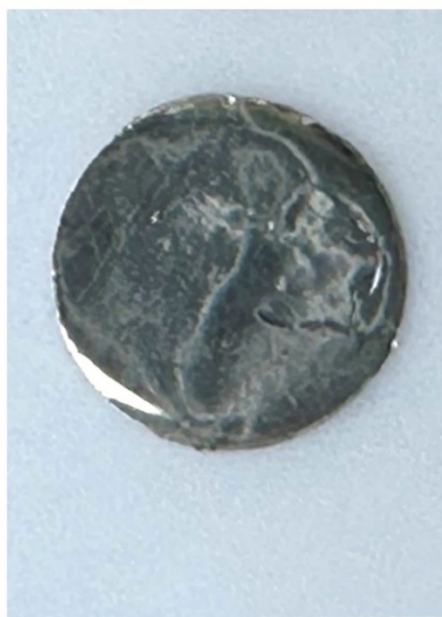

**NNVP20**

**Fig. S2** Photographs of bare Na foil and NNVP20 composite electrode.

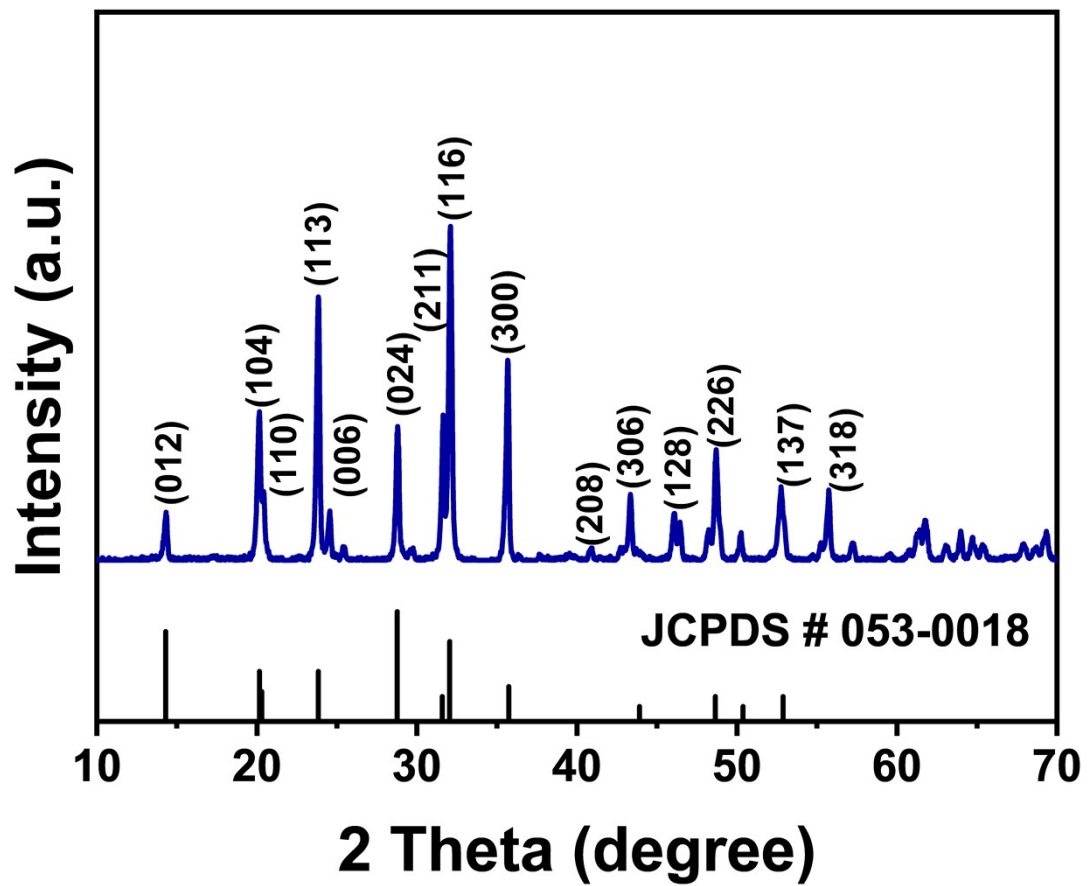

Fig. S3 X-ray diffraction spectra of NVP powder.

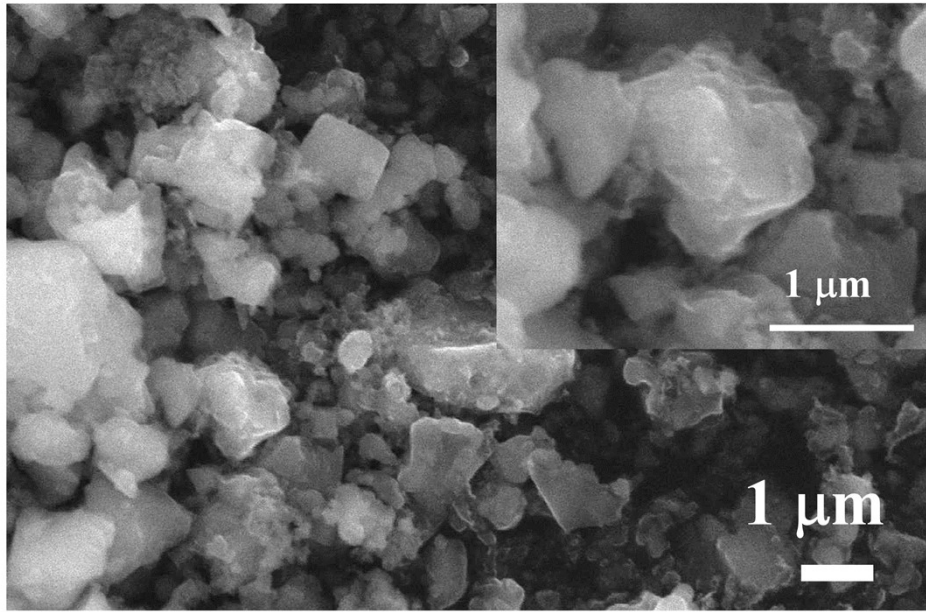

**Fig. S4** SEM images of NVP.

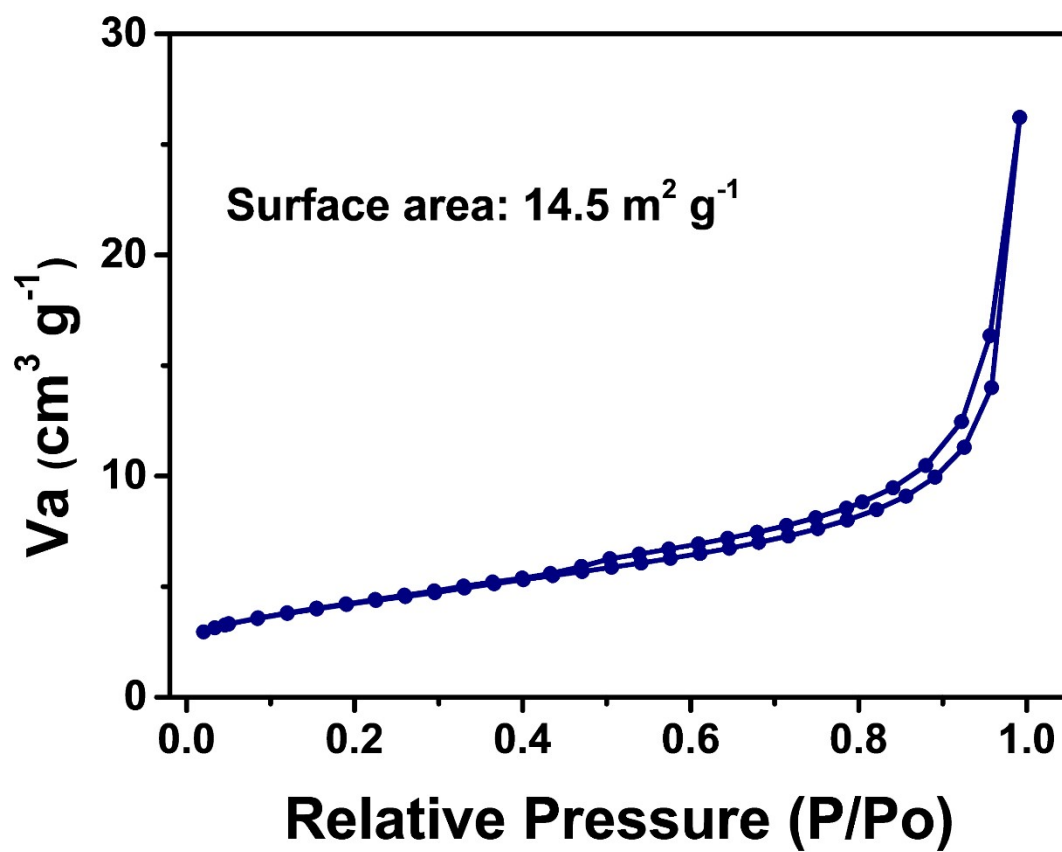

Fig. S5 Adsorption/desorption isotherms of NVP powder from  $\text{N}_2$  physisorption.



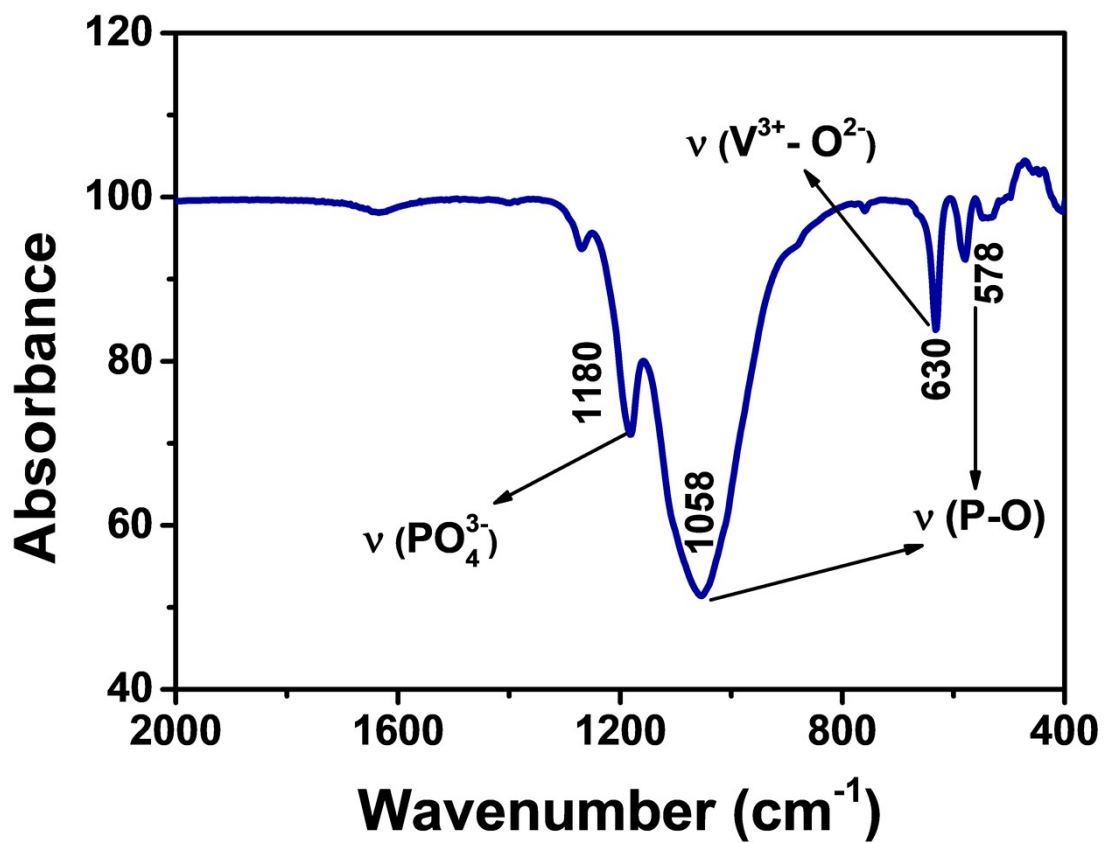

Fig. S6 FTIR spectra of NVP.

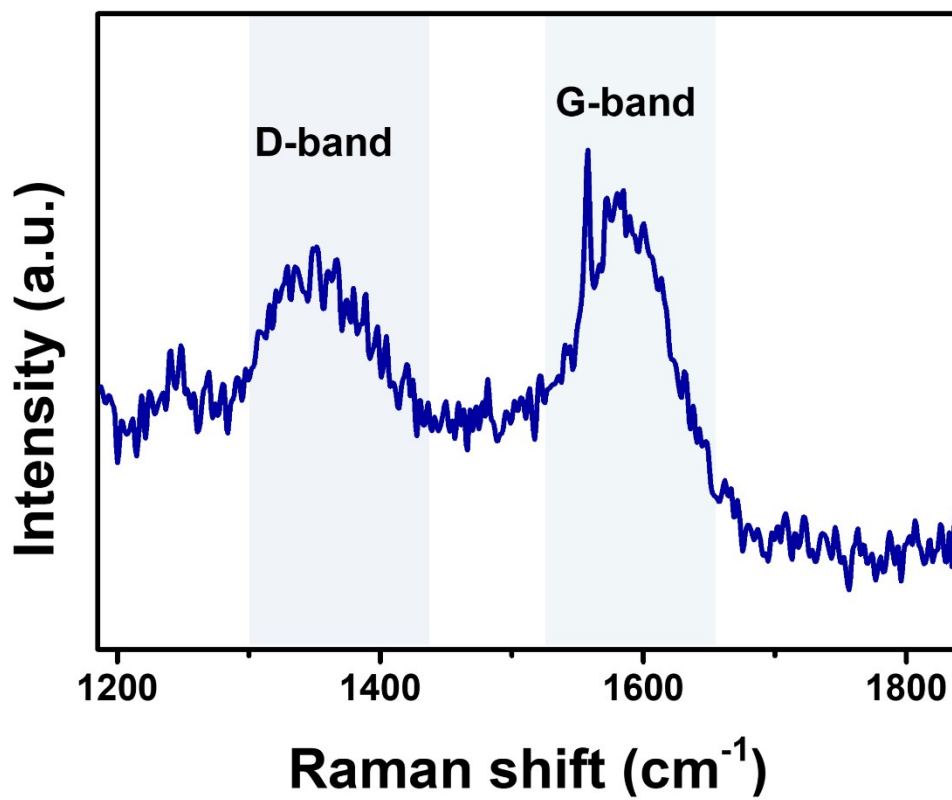

Fig. S7 Raman spectra of NVP.

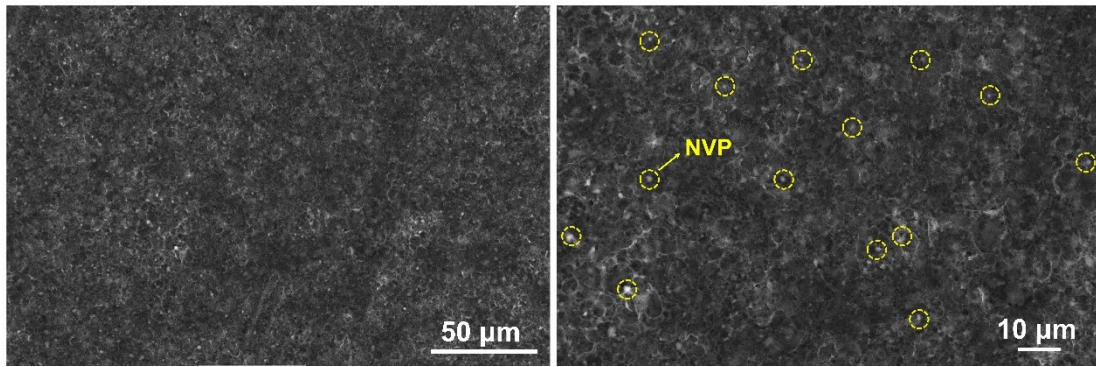

**Fig. S8** Top-view SEM images of NNVP20 composite electrode.

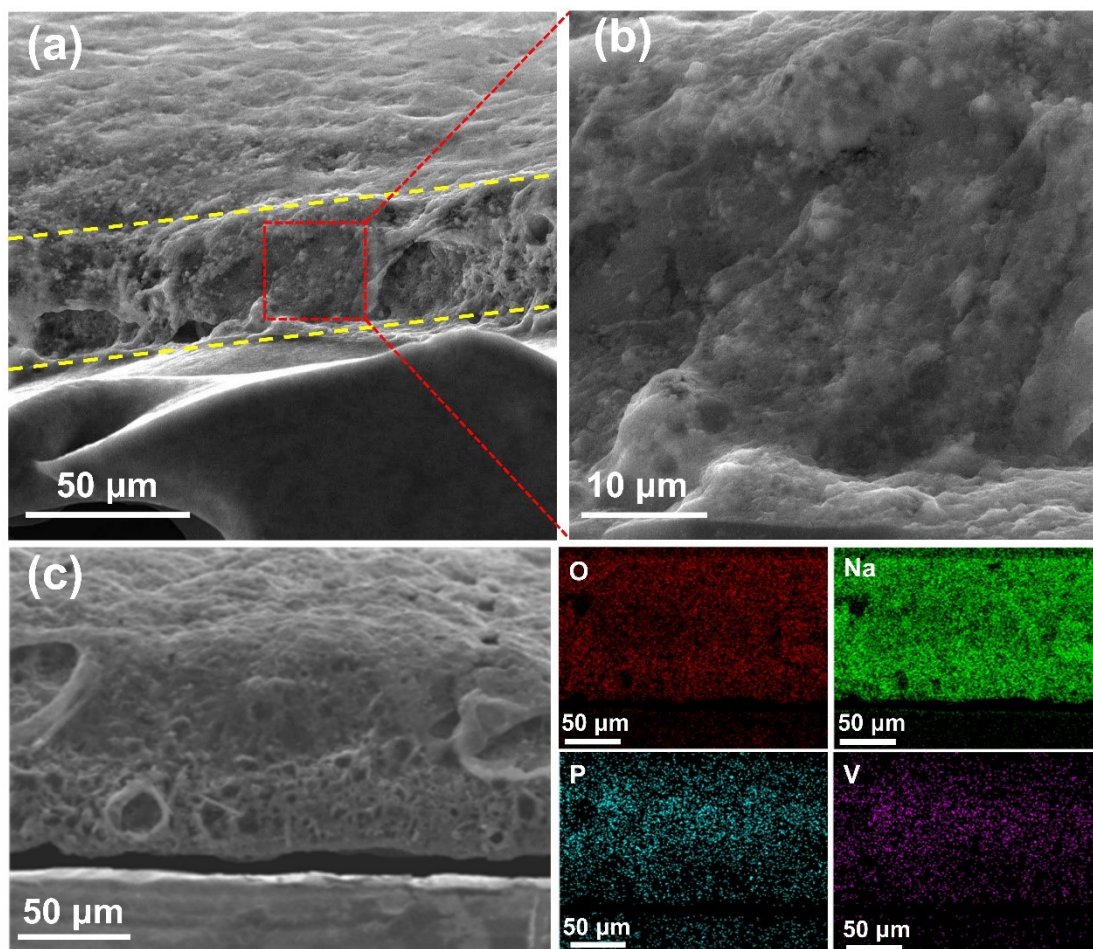

**Fig S9** (a-b) Cross-sectional SEM images of NNVP20 composite electrode at different magnification, (c) EDS spectrum and elemental mappings of O, Na, P, V.

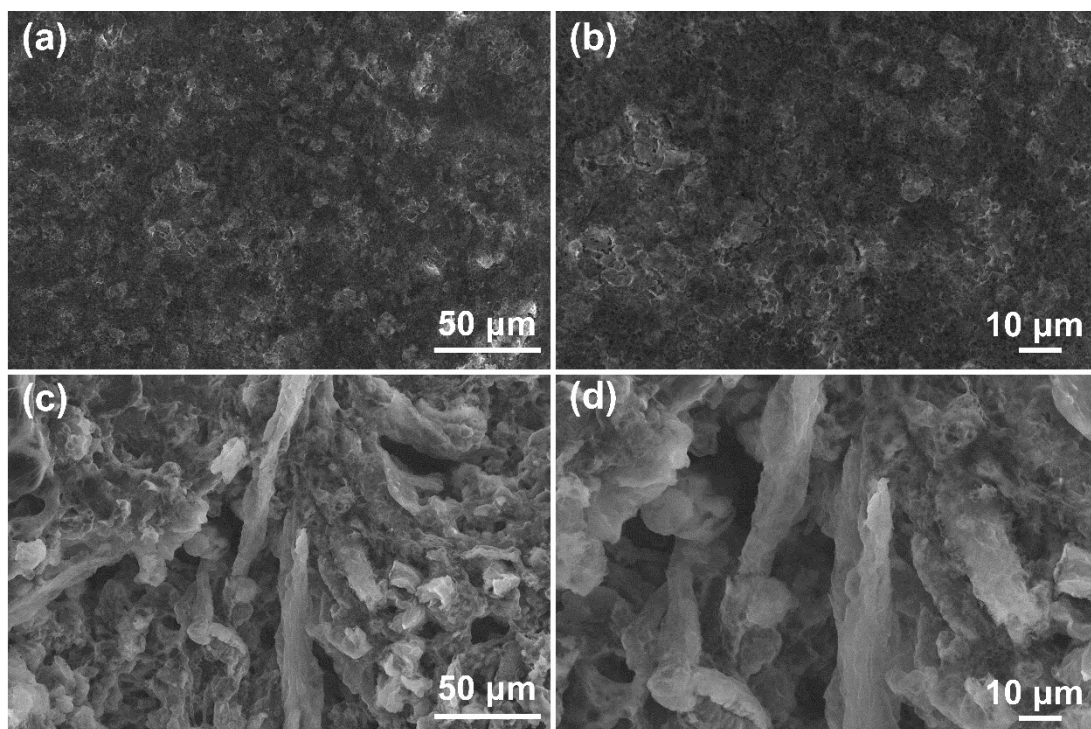

**Fig S10** SEM images of bare Na electrode (a-b) before cycles, (c-d) after cycles.

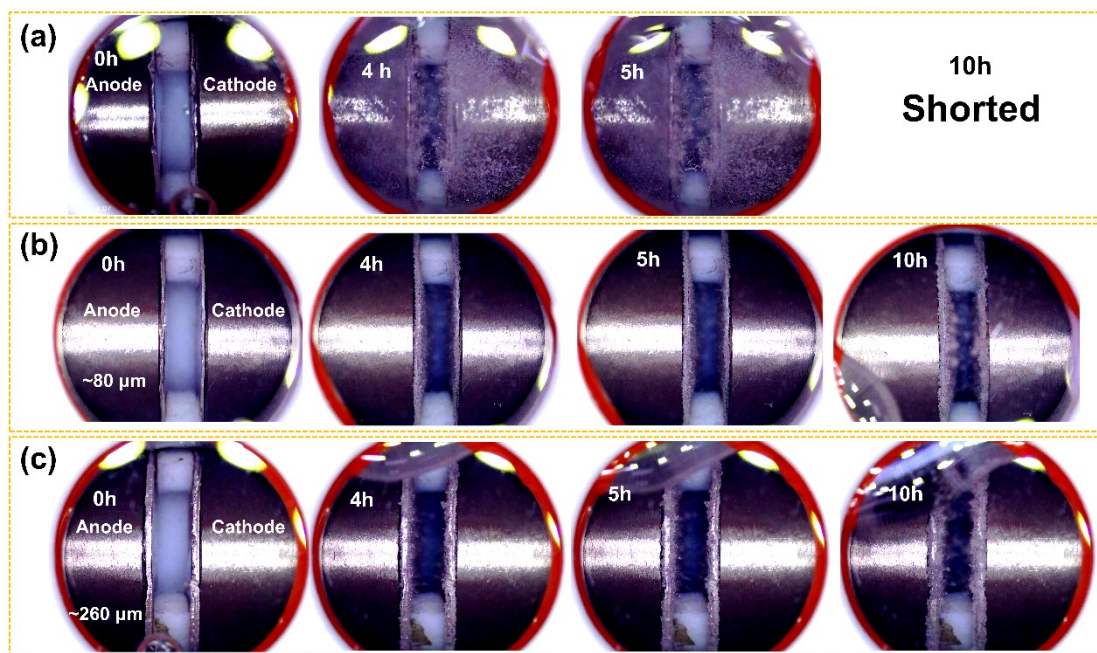

**Fig S11** *In situ* optical observation of symmetric cells with different electrodes. (a) bare Na, (b) thin NNVP20 (~80 μm), (c) thick NNVP20 (~260 μm).

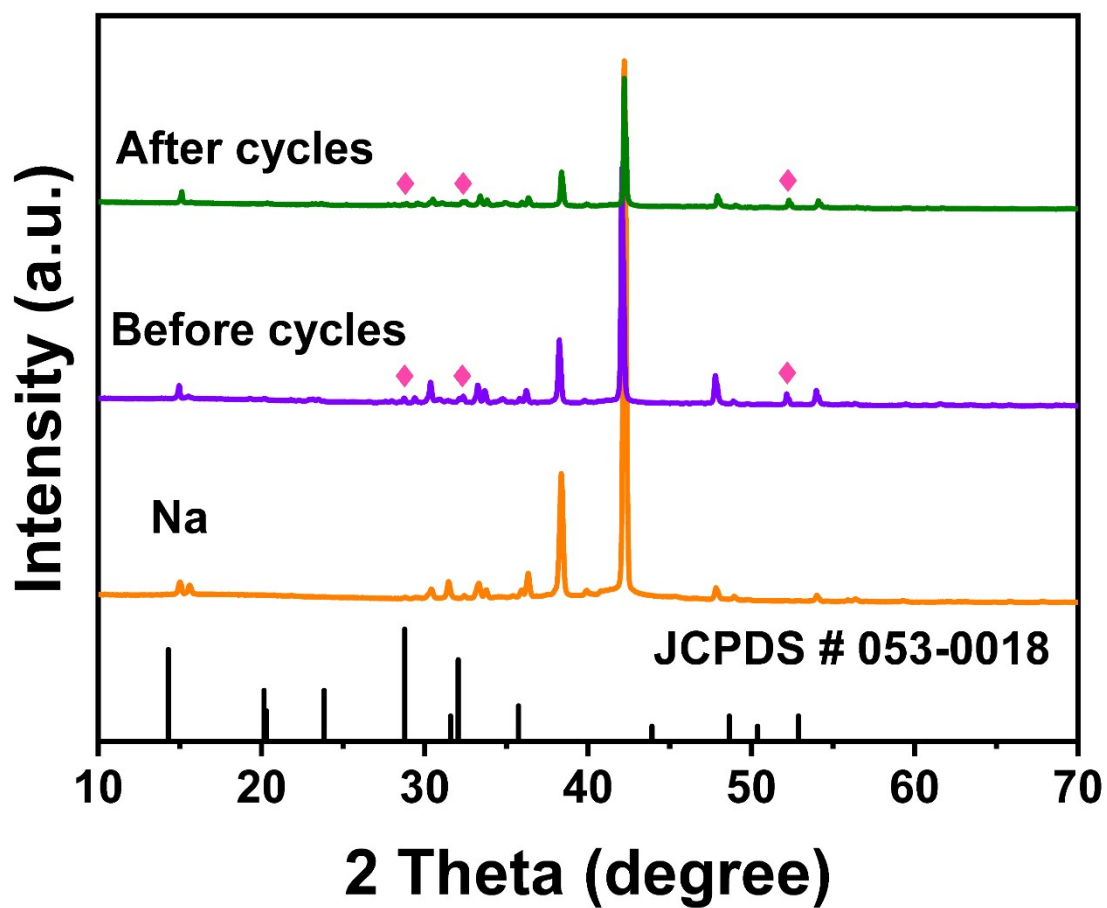

Fig S12 XRD pattern of bare Na and NNVP20 electrode before and after cycling.

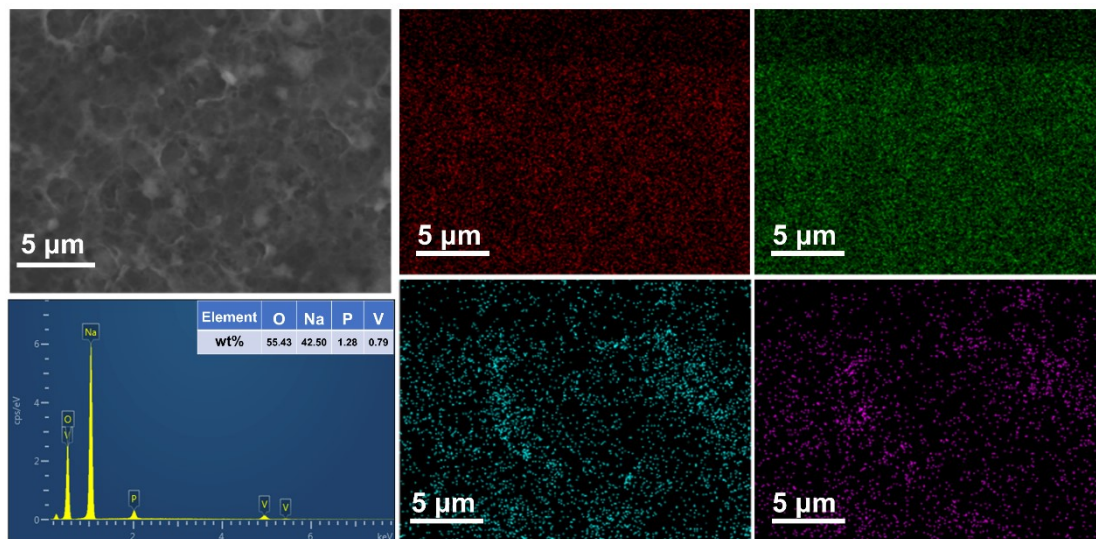

**Fig S13** EDS mapping of NNVP20 electrode before cycling.



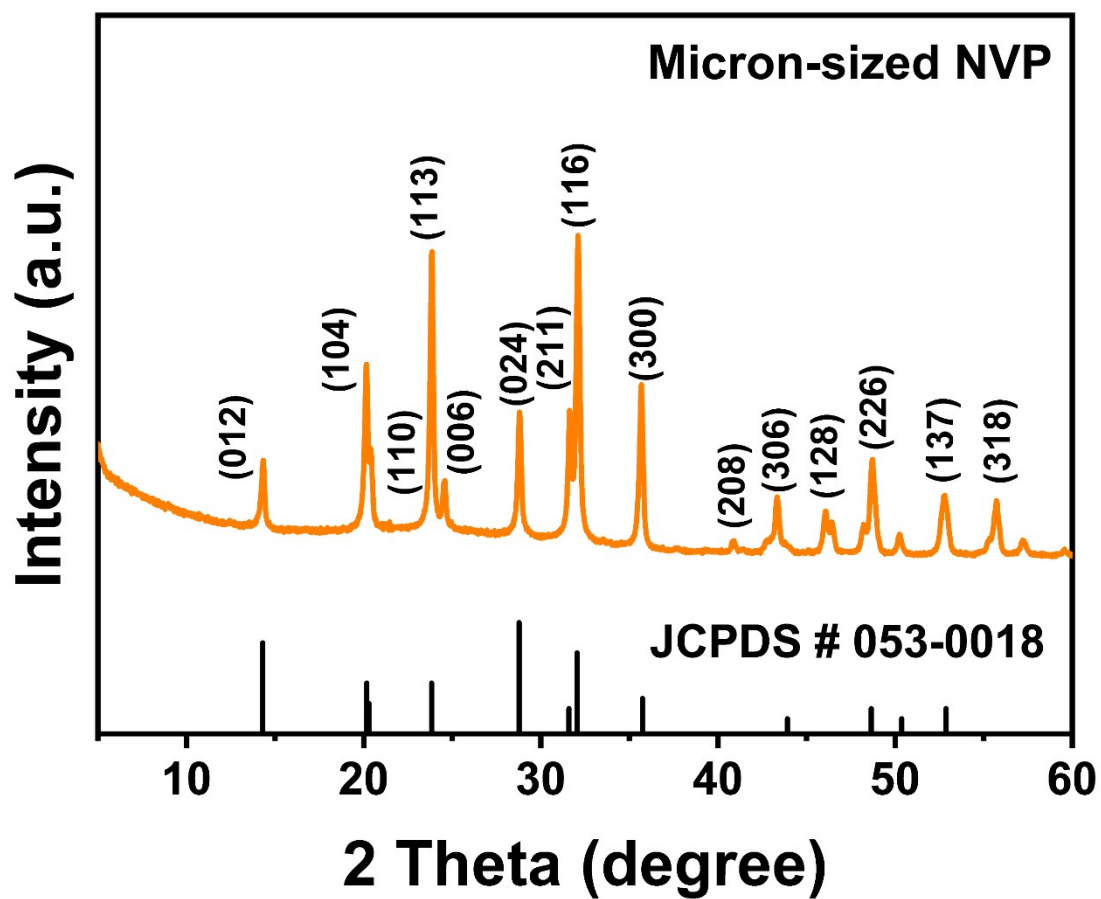

Fig S14 XRD pattern of micron-sized NVP.

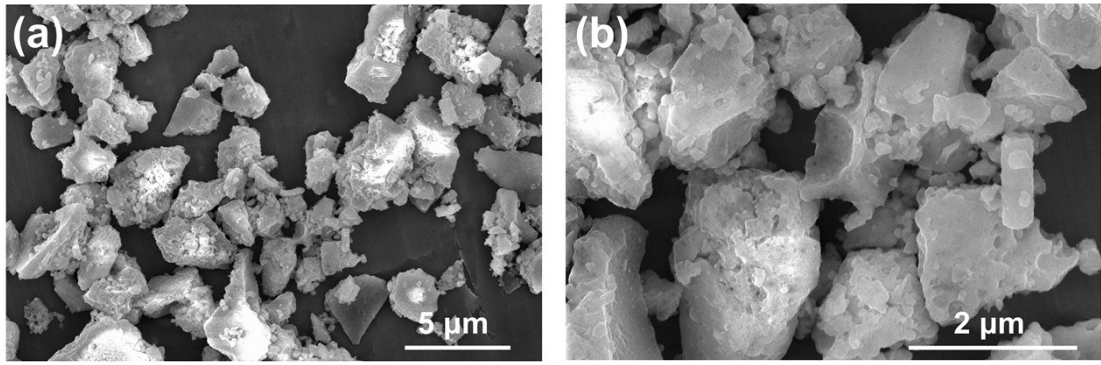

**Fig S15** SEM images of micron-sized NVP.

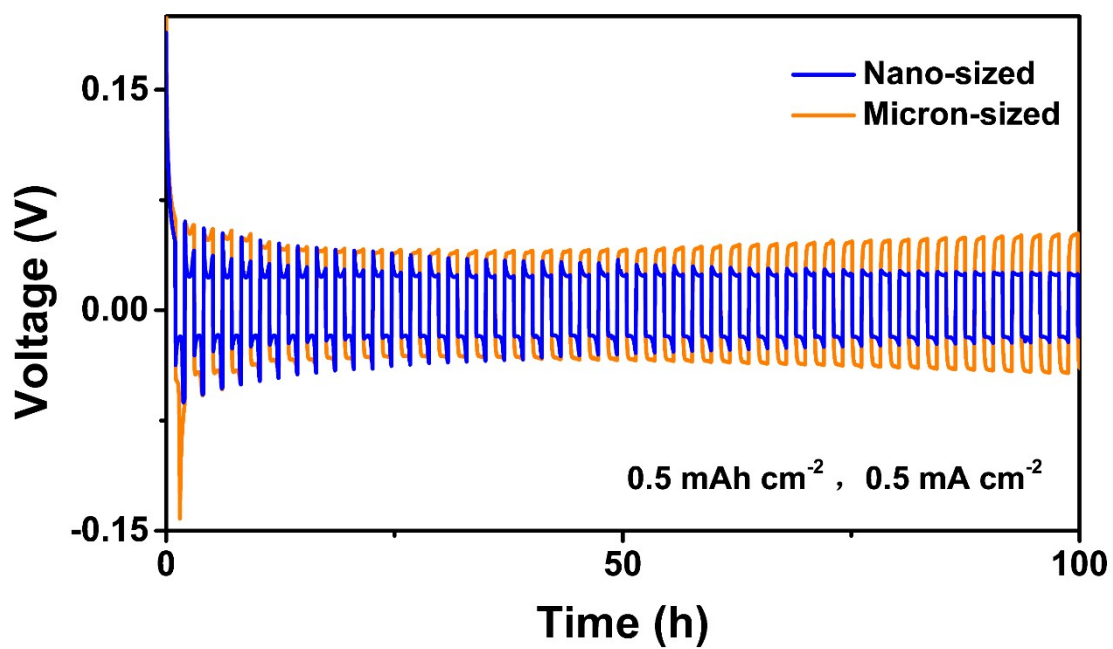

**Fig S16** Voltage-time curves of micron-sized NVP-Na symmetric cell and nano-sized NVP-Na (NNVP20) electrode.

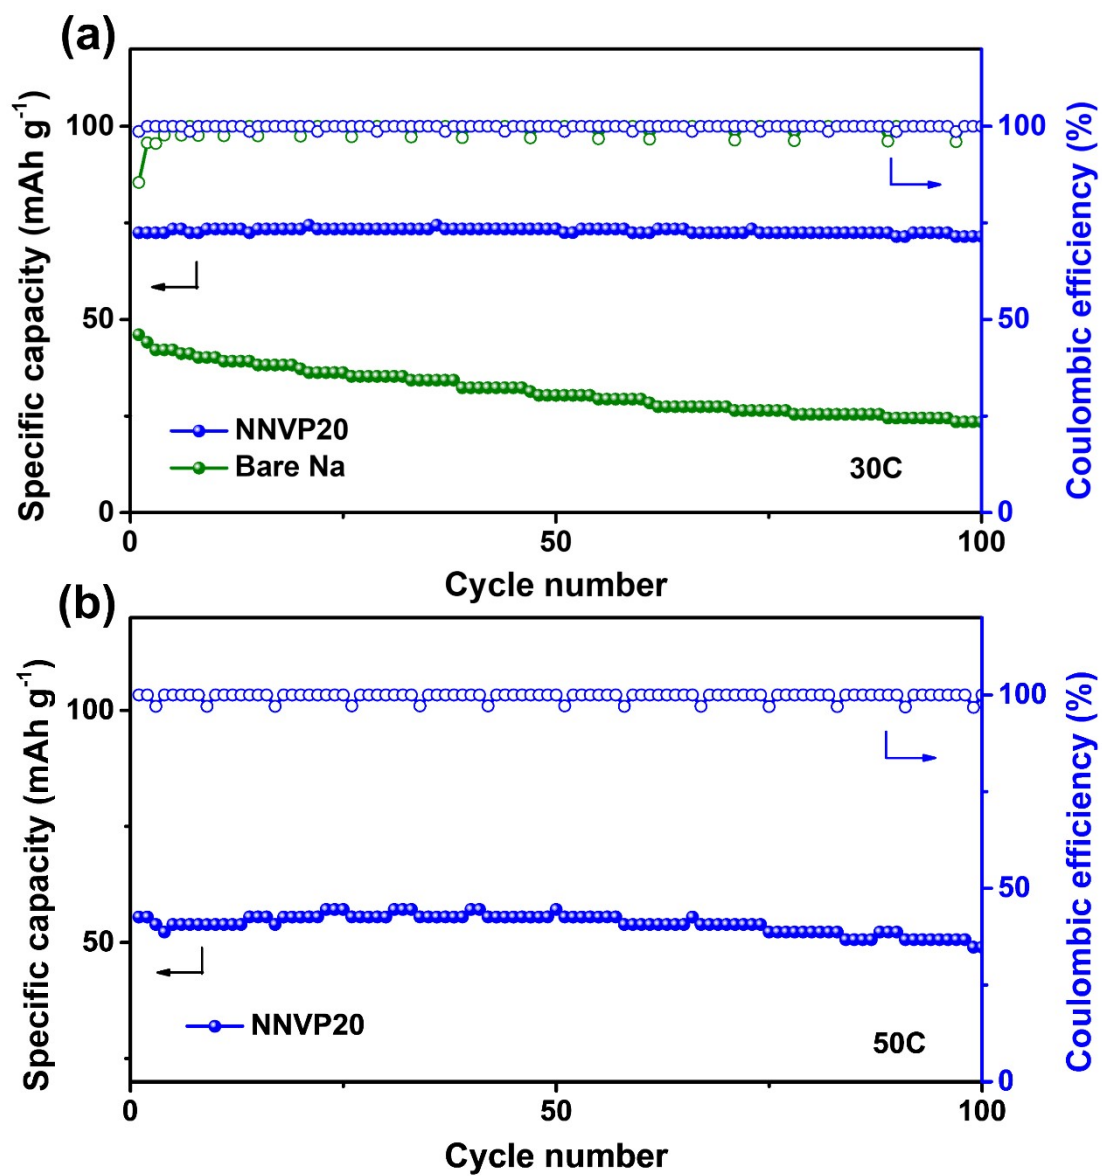

Fig S17 The cycling performances of half-cells with NVP/Na and Na anodes (a) 30C, (b) 50C.

## References

- 1 G. Kresse and J. Furthmüller, *Phys. Rev. B*, 1996, **54**, 11169-11186.
- 2 G. Kresse and J. Furthmüller, *Comp. Mater. Sci.*, 1996, **6**, 15-50.
- 3 J. P. Perdew, K. Burke and M. Ernzerhof, *Phys. Rev. Lett.*, 1996, **77**, 3865-3868.
- 4 G. Henkelman, B. P. Uberuaga and H. Jónsson, *J. Chem. Phys.*, 2000, **113**, 9901-9904.
- 5 G. Henkelman and H. Jónsson, *J. Chem. Phys.*, 2000, **113**, 9978-9985.
